# Supplementary material for: Investments, identities, and Chinese learning experience of an Irish adult: the role of context, capital, and agency
Source: publisher site journal article supplement (doi:10.1515/applirev-2024-0130), 2024-05-03
Supplement: Supplementary file 1 [file j_applirev-2024-0130_suppl_001.docx]

Appendix: Interview Protocols

1. Building rapport:
2. Thank you for taking part in the interview, I really appreciate your help. Can you tell me a bit about yourself, such as your age, occupation, or field of study?
3. Exploring participants’ second/foreign language learning experience (only asked in the first interview):
4. Do you speak any language other than English?
5. Some people say Irish language teaching at secondary schools in Ireland is awful. Do you have the same feelings?
6. Are you good at Irish/your second/foreign language? Can you tell me why you decided to learn it/them?
7. Do you think your foreign/second language learning experience makes you more/less motivated to learn Chinese?

Note: Follow-up questions will be asked after participants provide their initial responses.

1. Exploring the reasons why participants decided to learn Chinese and their Chinese-learning experience:
2. When did you become interested in Chinese?
3. Why and when did you decide to learn Chinese? Do you think you are working hard?
4. What do you think about the different Chinese courses that you did/are doing?
5. On a scale from 1 to 10, how motivated were you in terms of learning Chinese when you were taking these courses?
6. Why were you particularly motivated/unmotivated in this/these period(s)?

Note: Follow-up questions will be asked after participants provide their initial responses.

Closing the interview: I believe I have all the information I need. Can I contact you again if I realise I forgot to ask something? I hope you have a good day. Thank you very much for your help.
